# Supplementary material
Source: MDPI journal article supplement (https://www.mdpi.com/2071-1050/9/7/1102)
Supplement: s1 [file s1]

**Respondent data**

|                            |                               |                                  |                               |                |                            |                            |
|----------------------------|-------------------------------|----------------------------------|-------------------------------|----------------|----------------------------|----------------------------|
| <u>Age:</u>                | <input type="checkbox"/> ≤ 25 | <input type="checkbox"/> 26 – 64 | <input type="checkbox"/> ≥ 65 | <u>Gender:</u> | <input type="checkbox"/> M | <input type="checkbox"/> F |
| <u>City:</u>               | <u>Country:</u>               |                                  |                               |                |                            |                            |
| <u>Level of education:</u> |                               |                                  |                               |                |                            |                            |
| <u>Ocupation:</u>          |                               |                                  |                               |                |                            |                            |

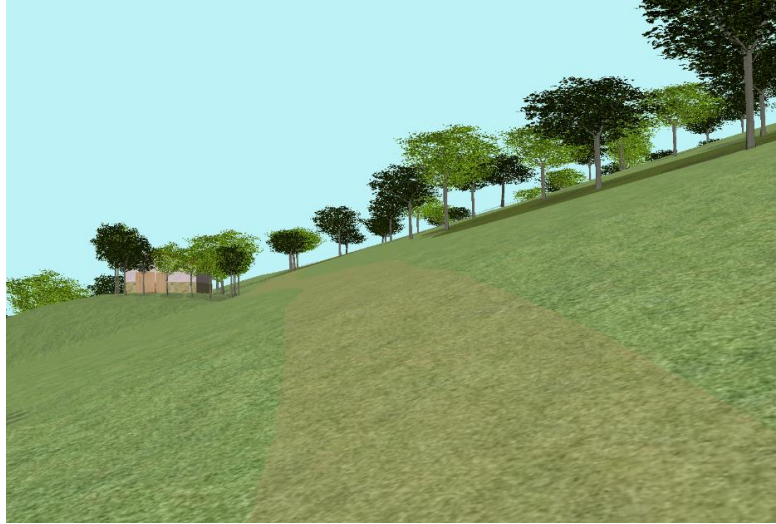

How would you rate this destination for doing outdoor tourism activities?

- ☐ Very Bad      ☐ Bad      ☐ Accetable      ☐ Good      ☐ Very Good

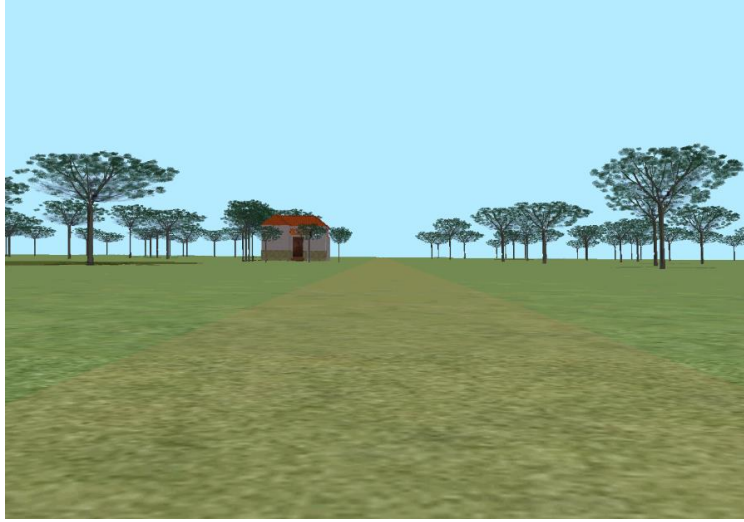

How would you rate this destination for doing outdoor tourism activities?

- ☐ Very Bad      ☐ Bad      ☐ Accetable      ☐ Good      ☐ Very Good

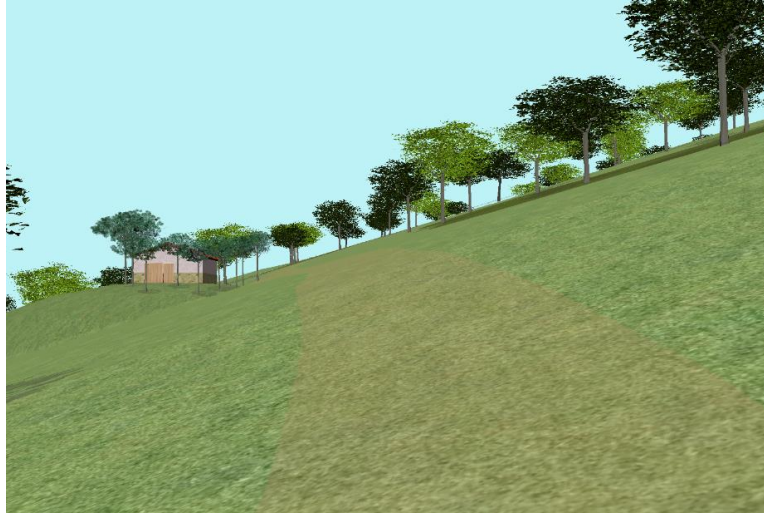

How would you rate this destination for doing outdoor tourism activities?

- ☐ Very Bad      ☐ Bad      ☐ Accetable      ☐ Good      ☐ Very Good

Would you change anything in the videos you have just seen? (If so, briefly explain)
